# Supplementary material for: Rare HCV subtypes and retreatment outcomes in a cohort of European DAA-experienced patients
Source: PubMed Central journal article supplement — JHEP Rep. 2024 Mar 25;6(7):101072. doi: 10.1016/j.jhepr.2024.101072 (PMC11246049; doi:10.1016/j.jhepr.2024.101072), 2024-03-25
Supplement: mmc1.pdf [file mmc1.pdf]

# Rare HCV subtypes and retreatment outcomes in a cohort of European DAA-experienced patients

Julia Dietz<sup>1</sup>, Christiana Graf<sup>1,2</sup>, Christoph P. Berg<sup>3</sup>, Kerstin Port<sup>4</sup>, Katja Deterding<sup>4</sup>, Peter Buggisch<sup>5</sup>, Kai-Henrik Peiffer<sup>1,7</sup>, Johannes Vermehren<sup>1</sup>, Georg Dultz<sup>1</sup>, Andreas Geier<sup>8</sup>, Florian P. Reiter<sup>8</sup>, Tony Bruns<sup>9</sup>, Jörn M. Schattenberg<sup>10,11</sup>, Elena Durmashkina<sup>12</sup>, Thierry Gustot<sup>13</sup>, Christophe Moreno<sup>13</sup>, Janina Trauth<sup>14,15</sup>, Thomas Discher<sup>14,15</sup>, Janett Fischer<sup>16</sup>, Thomas Berg<sup>16</sup>, Andreas E. Kremer<sup>17</sup>, Beat Müllhaupt<sup>17</sup>, Stefan Zeuzem<sup>1,2</sup>, Christoph Sarrazin<sup>1,2,12</sup>

## Table of contents

|                                                                                                                                                          |   |
|----------------------------------------------------------------------------------------------------------------------------------------------------------|---|
| Table S1: Countries of origin of DAA-failure patients with rare GT.....                                                                                  | 2 |
| Table S2: Primer and PCR conditions for NS5B amplification .....                                                                                         | 3 |
| Table S3: Published reference sequences .....                                                                                                            | 3 |
| A panel of 16 full-length HCV genomes was characterized in China belonging to genotypes 1–6 including subtype 2f and two novel genotype 6 variants ..... | 3 |
| References.....                                                                                                                                          | 4 |

**Table S1: Countries of origin of DAA-failure patients with rare GT**

| Patient        | Rare GT                |                                 |
|----------------|------------------------|---------------------------------|
|                |                        |                                 |
| <b>Country</b> | <b>Rare GT1 (n=6)</b>  | <b>Number of patients n (%)</b> |
| Germany        | 1*, 1c, 1e             | n=3                             |
| France         | 1e                     | n=1                             |
| Togo           | 1l                     | n=1                             |
| Nigeria        | 1*                     | n=1                             |
|                |                        |                                 |
|                | <b>Rare GT2 (n=2)</b>  |                                 |
| Germany        | 2k                     | n=1                             |
| Niger          | 2k                     | n=1                             |
|                |                        |                                 |
|                | <b>Rare GT3 (n=15)</b> |                                 |
| Germany        | 3k                     | n=1                             |
| Italy          | 3h                     | n=1                             |
| India          | 3b, 3g, 3h, 3i         | n=5                             |
| Bangladesh     | 3b, 3g                 | n=3                             |
| Pakistan       | 3b                     | n=2                             |
| Syria          | 3*                     | n=1                             |
| n.d.           | 3b                     | n=2                             |
|                |                        |                                 |
|                | <b>Rare GT4 (n=28)</b> |                                 |
| Germany        | 4*, 4c, 4f             | n=3                             |
| Belgium        | 4r                     | n=1                             |
| France         | 4r                     | n=1                             |
| Switzerland    | 4f                     | n=1                             |
| Egypt          | 4n, 4o                 | n=4                             |
| Angola         | 4r                     | n=1                             |
| DR Congo       | 4r                     | n=5                             |
| Burundi        | 4b                     | n=1                             |
| Eritrea        | 4r                     | n=5                             |
| Nigeria        | 4v                     | n=1                             |
| Saudi-Arabia   | 4r                     | n=2                             |
| n.d.           | 4r                     | n=3                             |
|                |                        |                                 |
|                | <b>GT5a (n=2)</b>      |                                 |
| France         | 5a                     | n=1                             |
| South Africa   | 5a                     | n=1                             |
|                |                        |                                 |
|                | <b>Rare GT6 (n=7)</b>  |                                 |
| Germany        | 6f, 6n                 | n=2                             |
| Vietnam        | 6e, 6r                 | n=2                             |
| Thailand       | 6f, 6r                 | n=2                             |
| n.d.           | 6e                     | n=1                             |

\*subtype unassigned

n.d., not determined

**Table S2: Primer and PCR conditions for NS5B amplification**

| Primer Name       | Sequence                                | PCR*      |
|-------------------|-----------------------------------------|-----------|
| RZ_1b_NS5B_out_fw | CTC CGT GTG GRA GGA CTT G               | Outer PCR |
| RZ_1a_NS5_out_fw  | CCG TGT GGA ARG ACC TTC TG              |           |
| P3_8713_out_rev   | GAV RCR TTG GAG GAG CAN GAT GT          |           |
| NS5B_7998_out_F   | CCA ATH SMY ACH ACC ATC ATG GC          | Inner PCR |
| P3_6816_rev**     | GGC GGA ATT CCT GGT CAT AGC CTC CGT GAA |           |
| P6_8611_rev**     | AAT TCC TGG TCA TAG CCT CCG TGA AGA CTC |           |

\*outer and inner PCRs were each performed with 40 cycles at 54°C. Sequencing of PCR products was conducted using P6\_8611\_rev. Further details can be found in [1]

\*\*Primer sequence adapted from [2]

**Table S3: Published reference sequences**

| Author | Title                                                                                                                                                                                                                                 | Citation |
|--------|---------------------------------------------------------------------------------------------------------------------------------------------------------------------------------------------------------------------------------------|----------|
| R. Xu  | A panel of 16 full-length HCV genomes was characterized in China belonging to genotypes 1–6 including subtype 2f and two novel genotype 6 variants                                                                                    | [3]      |
| C. Li  | Characterization of full-length hepatitis C virus sequences for subtypes 1e, 1h and 1i, and a novel variant revealed Cameroon as an area in origin for genotype 1                                                                     | [4]      |
| L. Lu  | Full-length genomes of 16 hepatitis C virus genotype 1 isolates representing subtypes 1c, 1d, 1e, 1g, 1h, 1i, 1j and 1k, and two new subtypes 1m and 1n, and four unclassified variants reveal ancestral relationships among subtypes | [5]      |
| L. Lu  | Full-length genome sequences of five hepatitis C virus isolates representing subtypes 3g, 3h, 3i and 3k, and a unique genotype 3 variant                                                                                              | [6]      |
| C. Li  | Complete genomic sequences for hepatitis C virus subtypes 4b, 4c, 4d, 4g, 4k, 4l, 4m, 4n, 4o, 4p, 4q, 4r and 4t                                                                                                                       | [7]      |
| C. Li  | An expanded taxonomy of hepatitis C virus genotype 6: Characterization of 22 new full-length viral genomes                                                                                                                            | [8]      |

## References

- [1] Dietz J, Susser S, Vermehren J, et al. Patterns of Resistance-Associated Substitutions in Patients With Chronic HCV Infection Following Treatment With Direct-Acting Antivirals. *Gastroenterology* 2018;154:976-988 e974.
- [2] Laperche S, Lunel F, Izopet J, et al. Comparison of hepatitis C virus NS5b and 5' noncoding gene sequencing methods in a multicenter study. *J Clin Microbiol* 2005;43:733-739.
- [3] Xu R, Tong W, Gu L, et al. A panel of 16 full-length HCV genomes was characterized in China belonging to genotypes 1-6 including subtype 2f and two novel genotype 6 variants. *Infect Genet Evol* 2013;20:225-229.
- [4] Li C, Njouom R, Pepin J, et al. Characterization of full-length hepatitis C virus sequences for subtypes 1e, 1h and 1l, and a novel variant revealed Cameroon as an area in origin for genotype 1. *J Gen Virol* 2013;94:1780-1790.
- [5] Lu L, Li C, Xu Y, et al. Full-length genomes of 16 hepatitis C virus genotype 1 isolates representing subtypes 1c, 1d, 1e, 1g, 1h, 1i, 1j and 1k, and two new subtypes 1m and 1n, and four unclassified variants reveal ancestral relationships among subtypes. *J Gen Virol* 2014;95:1479-1487.
- [6] Lu L, Li C, Yuan J, et al. Full-length genome sequences of five hepatitis C virus isolates representing subtypes 3g, 3h, 3i and 3k, and a unique genotype 3 variant. *J Gen Virol* 2013;94:543-548.
- [7] Li C, Lu L, Wu X, et al. Complete genomic sequences for hepatitis C virus subtypes 4b, 4c, 4d, 4g, 4k, 4l, 4m, 4n, 4o, 4p, 4q, 4r and 4t. *J Gen Virol* 2009;90:1820-1826.
- [8] Li C, Barnes E, Newton PN, et al. An expanded taxonomy of hepatitis C virus genotype 6: Characterization of 22 new full-length viral genomes. *Virology* 2015;476:355-363.
